# Supplementary material for: Holistic Investigation of the Inert Thermal Treatment of Industrially Shredded NMC 622 Lithium-Ion Batteries and Its Influence on Selective Lithium Recovery by Water Leaching
Source: MDPI journal article supplement (doi:10.3390/met13122000), 2023-12-12
Supplement: s1 [file s1]

Archive with 1 entries (1 files):
- metals-2744355-supplementary.pdf
