# Supplementary figures and images for: Holistic Investigation of the Inert Thermal Treatment of Industrially Shredded NMC 622 Lithium-Ion Batteries and Its Influence on Selective Lithium Recovery by Water Leaching
Source: MDPI journal article supplement (doi:10.3390/met13122000), 2023-12-12

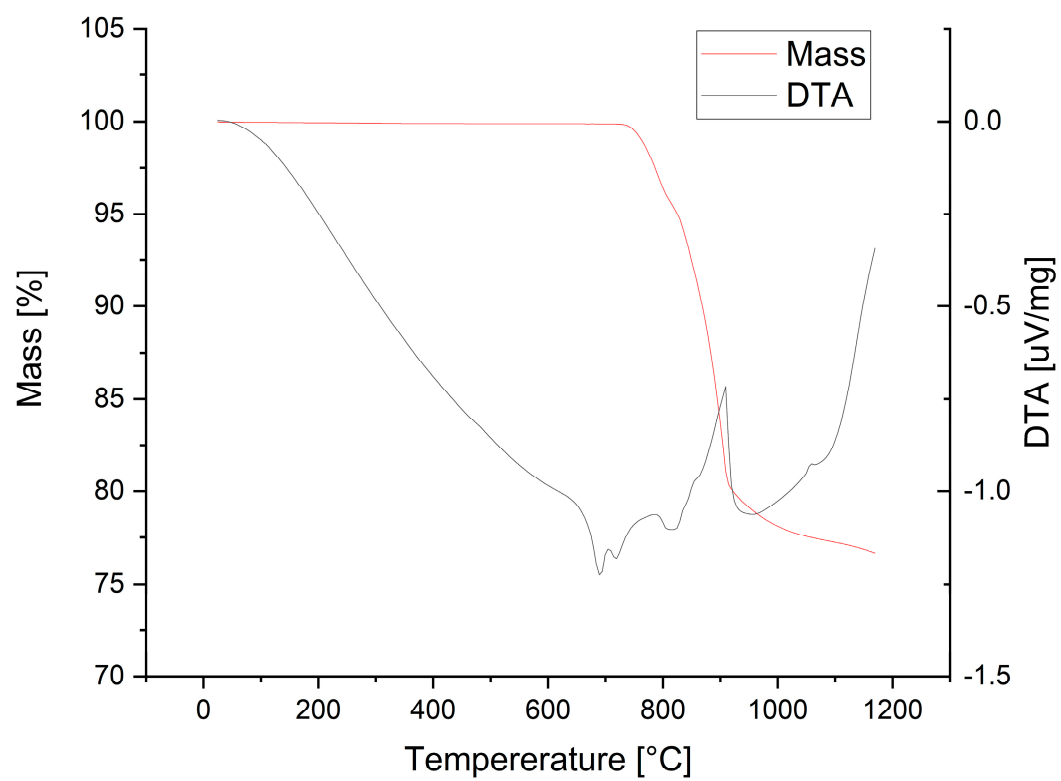

Figure S1: TGA/DTA analysis of a mixture of pure NMC 622 and graphite.

Supplement: s1 [file s1 › metals-2744355-supplementary.pdf]
